# Supplementary material for: Drug Repositioning as a Therapeutic Strategy against Streptococcus pneumoniae: Cell Membrane as Potential Target
Source: MDPI journal article supplement (doi:10.3390/ijms24065831), 2023-03-18
Supplement: s1 [file s1]

## **Supplementary information**

### **Drug repurposing/repositioning as a therapeutic strategy against *Streptococcus pneumoniae*: cell membrane as potential target**

Laura Ortiz-Miravalles, Manuel Sánchez-Angulo, Jesús M. Sanz and Beatriz Maestro

**Figure S1**

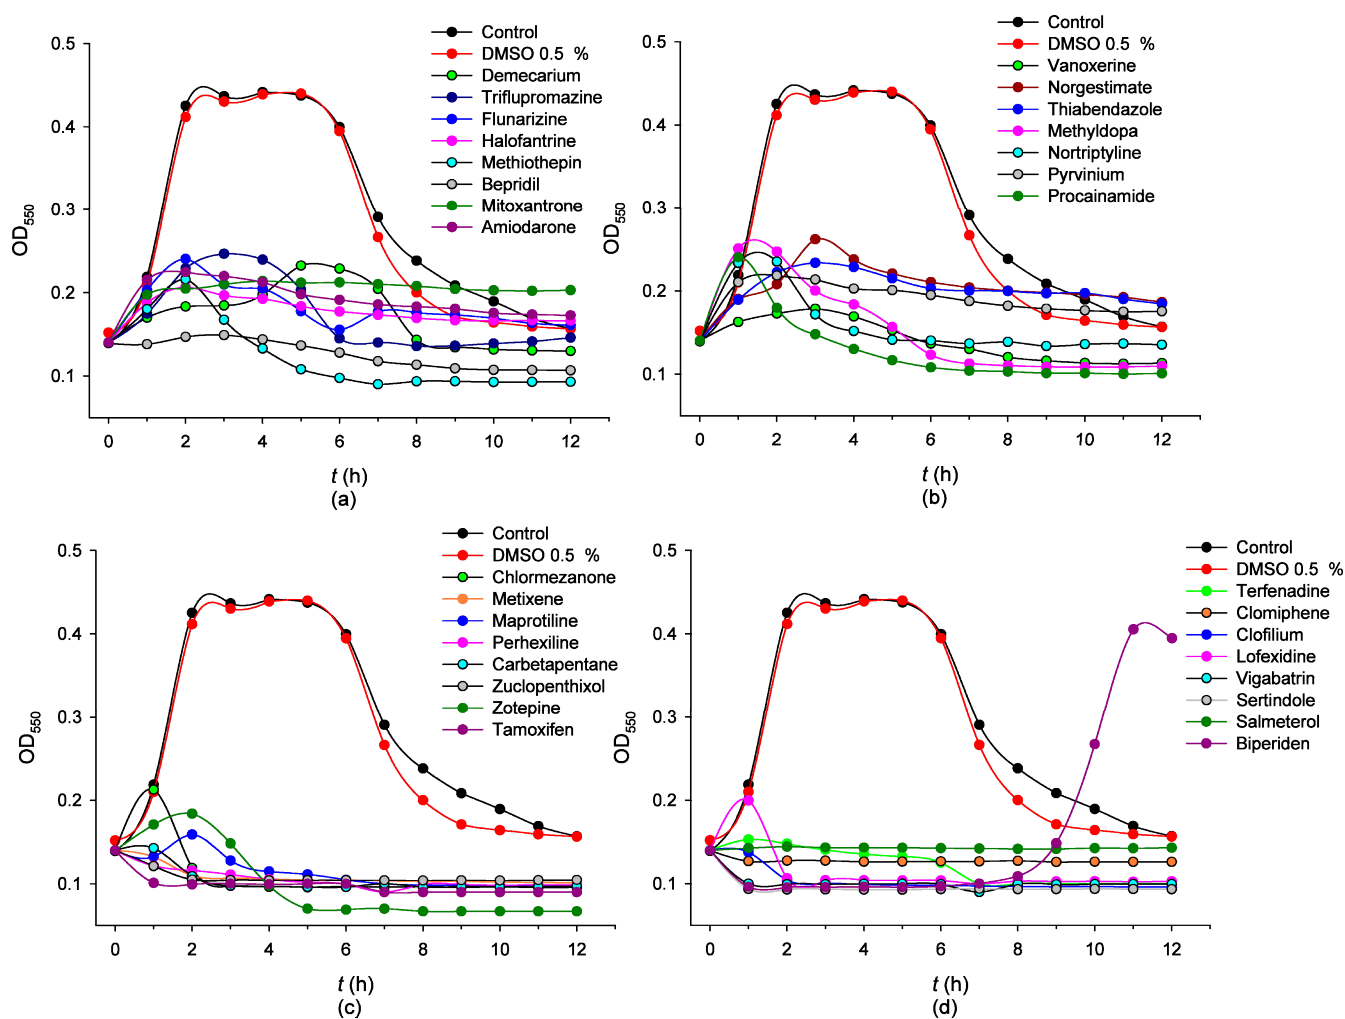

**Figure S1.** (a-d) Planktonic cultures of *S. pneumoniae* R6CIB17 in the presence of 50  $\mu$ M concentration of the 31 primary selected molecules (red circles in Figure 1a of the main text). Each compound was added at the early exponential phase.

Table S1

| Compound                     | CAS ID     | Chemical structure                                                                   | Therapeutic approved use                          | Mechanism of action                |
|------------------------------|------------|--------------------------------------------------------------------------------------|---------------------------------------------------|------------------------------------|
| 1<br>Thiabendazole           | 148-79-8   | 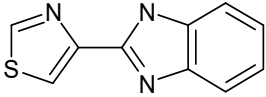    | Anthelmintic                                      | Microtubule inhibitor              |
| 2<br>Lofexidine              | 31036-80-3 |     | Opinoid withdrawal symptoms, antihypertensive     | Alpha2-adrenergic receptor agonist |
| 3<br>Biperiden hydrochloride | 1235-82-1  |   | Antiparkinsonian                                  | Anticholinergic                    |
| 4<br>Vigabatrin              | 60643-86-9 |   | Anticonvulsant GABA                               | Transaminase inhibitor             |
| 5<br>Norgestimate            | 35189-28-7 |  | Hormonal contraception Menopausal hormone therapy | Progestogen                        |
| 6<br>Salmeterol              | 89365-50-4 |  | Bronchodilator                                    | Beta 2 adrenergic agonist          |

**Table S1** (cont)

|                                        |             |                                                                                      |                                                                    |                                                                      |
|----------------------------------------|-------------|--------------------------------------------------------------------------------------|--------------------------------------------------------------------|----------------------------------------------------------------------|
| 7<br>Sertindole                        | 106516-24-9 | 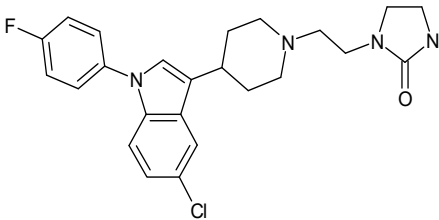   | Antipsychotic                                                      | Dopamine<br>D2/Serotonin 5-<br>HT2 receptor<br>antagonist            |
| 8<br>Nortriptyline<br>hydrochloride    | 894-71-3    |     | Antidepressant<br>Sedative<br>Analgesic<br>Muscle relaxant         | Norepinephrine<br>uptake inhibitor                                   |
| 9<br>Methyldopa (L,-)                  | 555-30-6    |     | Antihypertensor                                                    | L-aromatic<br>aminoacid<br>decarboxylase<br>inhibitor                |
| 10<br>Pyrvinium pamoate                | 3546-41-6   |  | Antiparasitic                                                      | Metabolic inhibitor                                                  |
| 11<br>Procainamide<br>hydrochloride    | 614-39-1    |  | Antiarrhythmic<br><br>Vasodilatator                                | Alpha antagonist<br><br>Antinuclear<br>antibodies<br>Anticholinergic |
| 12<br>Maprotiline<br>hydrochloride     | 10347-81-6  |  | Antidepressant<br><br>Sedative<br><br>Antihistaminic<br>Anxiolytic | Noradrenaline<br>uptake inhibitor<br>5-HT uptake<br>inhibitor        |
| 13<br>Triflupromazine<br>hydrochloride | 1098-60-8   |   | Antipsychotic<br><br>Tranquilizer<br>Antiemetic<br>Antihypertensor | Dopaminergic<br>antagonist                                           |

**Table S1** (cont)

|                                      |            |                                                                                     |                                                   |                                                                                                                                          |
|--------------------------------------|------------|-------------------------------------------------------------------------------------|---------------------------------------------------|------------------------------------------------------------------------------------------------------------------------------------------|
| 14<br>Demecarium<br>bromide          | 56-94-0    | 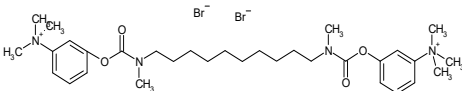  | Cholinergic<br>(ophthalmic)                       | Acetyl-cholinesterase<br>inhibitor<br>(parasympathomime-<br>tic, cholinomimetic<br>drug or cholinergic<br>receptor stimulating<br>agent) |
| 15<br>Chlormezanone                  | 80-77-3    |    | Skeletal muscle<br>relaxant                       | Potentiator of<br>GABA effects                                                                                                           |
| 16<br>Flunarizine<br>dihydrochloride | 30484-77-6 |    | Vasodilatator<br>Anticonvulsant<br>Antiarrhythmic | Na <sup>+</sup> channel<br>blocker<br>Ca <sup>2+</sup> antagonist<br>H1 antagonist                                                       |
| 17<br>Metixene<br>hydrochloride      | 1553-34-0  |   | Antiparkinsonian                                  | Anticholinergic                                                                                                                          |
| 18<br>Methiothepin<br>maleate        | 19728-88-2 |  | Antipsychotic                                     | 5-HT autoreceptor<br>antagonist<br>5-HT1c antagonist<br>5-HT release<br>inhibitor electrical<br>or K <sup>+</sup> induced                |
| 19<br>Perhexiline maleate            | 6724-53-4  |  | Vasodilatator                                     | Ca <sup>2+</sup> blocking<br>agent                                                                                                       |
| 20<br>Carbetapentane<br>citrate      | 23142-01-0 |  | Antitussive<br>Spasmolytic                        | Sigma 1 receptor<br>ligand                                                                                                               |

**Table S1** (cont)

|                                                    |            |  |                                                                                        |                                                                                                        |
|----------------------------------------------------|------------|--|----------------------------------------------------------------------------------------|--------------------------------------------------------------------------------------------------------|
| 21<br>Bepidil<br>hydrochloride                     | 74764-40-2 |  | Antianginal                                                                            | Ca <sup>2+</sup> channel<br>blocker                                                                    |
| 22<br>Zotepine                                     | 26615-21-4 |  | antipsychotic                                                                          | Dopamine<br>D2/serotonin 5-<br>HT2 antagonist                                                          |
| 23<br>Zuclopenthixol<br>hydrochloride              | 633-59-0   |  | Delirium<br>Schizophrenia<br>Antipsychotic<br>Sedative<br>Neuroleptic<br>Schizophrenia | Dopaminergic<br>receptor antagonist                                                                    |
| 24<br>Halofantrine<br>hydrochloride                | 36167-63-2 |  | Antimalarial                                                                           | Blocker of HERG<br>channels                                                                            |
| 25<br>Clofilium tosylate                           | 92953-10-1 |  | Antiarrhythmic                                                                         | K <sup>+</sup> channel blocker                                                                         |
| 26<br>Vanoxerine<br>(GBR 12909<br>dihydrochloride) | 67469-78-7 |  | Antidepressant<br>Antiarrhythmic                                                       | Dopamine<br>reuptake inhibitor<br>Na <sup>+</sup> channel<br>blocker<br>K <sup>+</sup> channel blocker |
| 27<br>Mitoxantrone<br>dihydrochloride              | 70476-82-3 |  | Antineoplastic<br><br>Anticancer                                                       | DNA<br>topoisomerase II<br>inhibitor                                                                   |

**Table S1** (cont)

|                                                         |            |                                                                                      |                                   |                                                                                                         |
|---------------------------------------------------------|------------|--------------------------------------------------------------------------------------|-----------------------------------|---------------------------------------------------------------------------------------------------------|
| <b>28</b><br><b>Amiodarone</b><br><b>hydrochloride</b>  | 19774-82-4 | 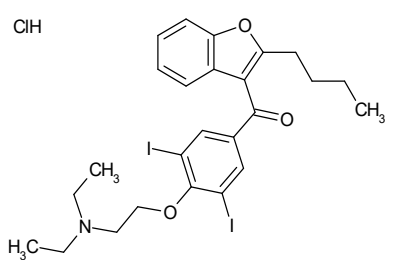   | Antiarrhythmic<br><br>Antianginal | Na <sup>+</sup> and K <sup>+</sup><br>channel blocker;<br>Non-competitive<br>beta-adrenergic<br>blocker |
| <b>29</b><br><b>Tamoxifen citrate</b>                   | 54965-24-1 |     | Anticancer                        | Protein kinase C<br>inhibitor<br>Oestrogen receptor<br>antagonist                                       |
| <b>30</b><br><b>Terfenadine</b>                         | 50679-08-8 |   | Antihistaminic                    | H1 antagonist<br>Na <sup>+</sup> , K <sup>+</sup> and Ca <sup>2+</sup><br>channels blocker              |
| <b>31</b><br><b>Clomiphene</b><br><b>citrate (Z, E)</b> | 50-41-9    |  | Ovulation<br>inductor             | Antioestrogen<br>Gonad-stimulating<br>agent                                                             |

**Table S1.** Characteristics of the 31 compounds selected as appreciably affecting planktonic pneumococcal growth at 50  $\mu$ M and that had not been previously reported as antipneumococcal agents (red circles in Figure 1a of the main text). Those that, additionally, induced at 25  $\mu$ M a decrease in bacterial viability higher than 90 % relative to the control, are represented in bold (compounds 25-31).
